# Supplementary material
Source: Springer Nature journal article supplement (https://www.springermedizin.de/resource/supplementary/12935_2006_147_MOESM7_ESM.pdf/9541184)

MEF 10(1)

MEF 12(1)

1 2 3 4 5

6 7 8 9 10

Cyclin B1

$\beta$ -Actin

Time (hours)

0 0 8 24 32

0 0 8 24 32

Control

10 Gy

Control

10 Gy

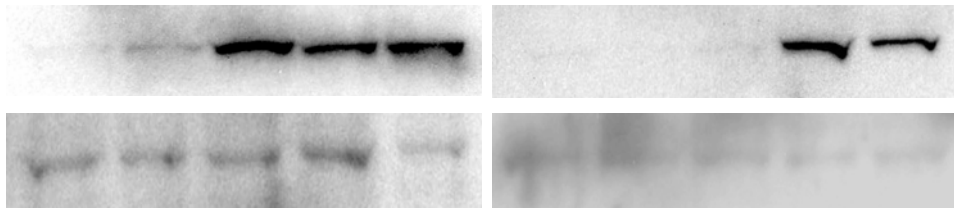

Supplement: MOESM7 [file 9541184]
